# Supplementary material for: Intussusceptive Vascular Remodeling Precedes Pathological Neovascularization
Source: PubMed Central journal article supplement (PMC6636809; doi:10.1161/atvbaha.118.312190), 2019-05-09

## **Supplemental information**

### **Additional, non-essential details to materials and methods**

#### **Hypoxia exposure.**

Water oxygen levels were controlled by an oxygen regulator (Loligo Systems, Denmark), which engaged/disengaged the perfusion of nitrogen into the water depending on the oxygen concentration, measured by an in-tank oxygen electrode. The water was constantly stirred to avoid buildup of oxygen gradients, and was covered by a loose lid.

#### **Zebrafish euthanasia and dissection.**

Dissection of the eyes was performed with the aid of tweezers (Dumont # 5) and spring scissors (Agnthos AB, Sweden) to cut out the cornea and remove the retina. The multilayered choroid body/retina mirabile was slowly removed from the CC, which was peeled off together with Bruch's membrane from its attachment to the retinal pigment epithelium. The isolated retina was then cut 4-5 times around its wall and flat mounted on a glass slide. The CC was flat mounted without incisions. Tissues were mounted in Vectashield (H-1000 Vector laboratories) within a viewing chamber on a glass slide. The top cover slide was separated from the glass slide by spacers (1 cover-slide high) and fixed in place by nail polish.

#### **RNA-sequencing**

Reads were aligned with STAR to the genome (assembly danRer6, because of annotation issues with danRer7). Non-uniquely aligning reads were discarded. We then calculated expression values and read counts using rpkmforgenes (available at

<http://sandberg.cmb.ki.se/rnaseq/>) with settings -fulltranscript -mRNAorm -mrnameoverlap -bothendsceil and Ensembl gene annotation from 20 Aug 2010. As quality control, we calculated Spearman correlation between samples, and removed the worst samples. All samples within each group were comparable after multiple testing correction. Raw data and expression values have been deposited to NCBI Sequence Read Archive with ID SRP056125 and Gene Expression Omnibus with ID GSE66848. False discovery rates were calculated by the Benjamini-Hochberg method.

### **Human choroidal and retinal qPCR analysis.**

The primer sets were purchased from Eurogentec (BioNordika Sweden AB) and sequences are listed as follows: hVEGFA-forward: 5'-AGGGCA-GAA-TCA-TCA-CGA-AGT-3' and -reverse: 5'-AGG-GTC-TCG-ATT-GGA-TGG 4 CA-3'. hPIGF-forward: 5'-GAA-CGG-CTC-GTC-AGA-GGT-G-3' and -reverse: 5'-ACAGTG-CAG-ATT-CTC-ATC-GCC-3'. hVEGFR1-forward: 5'- GAA-AAC-GCA-TAA-TCTGGG-ACA-GT-3' and -reverse: 5'-GCG-TGG-TGT-GCT-TAT-TTG-GA-3'. hVEGFR2forward: 5'-AAC-GTG-TCA-CTT-TGT-GCA-AGA-3' and -reverse: 5'-TTC-CAT-GAGACG-GAC-TCA-GAA-3'. hTBP-forward: 5'-CCA-CTC-ACA-GAC-TCT-CAC-AAC-3' and -reverse: 5'-CTG-CGG-TAC-AAT-CCC-AGA-ACT-3'

### **EM of donor eyes**

Healthy aged eyes without known ophthalmic diseases were obtained from the Eye Hospital Tuebingen. A glutaraldehyde-fixed tissue sample of the perimacular central region of an AMD donor eye (76 years, male) was obtained from the Foundation fighting Blindness (USA). The AMD eye was investigated by experienced ophthalmologists who stated the AMD type of both eyes including the different types of lesions found in each eye. The pathology

reports also stated the cause of death and further diseases. Written informed consent of all donors for use in medical research and additional approval of the Institutional Review Board of the University of Tuebingen were obtained. The experiments were performed in adherence to the tenets of the Declaration of Helsinki.

The eyes were opened with a circular slit at the limbus and fixed overnight at 4° C in 4% glutaraldehyde in 0.1 M cacodylate buffer (pH 7.4). Then the iris and vitreous were removed and the perimacular region was excised and further prepared for EM as follows. Small pieces (1.5 mm<sup>3</sup>) were washed 3 times in 0.1 M cacodylate buffer, postfixed in 1% osmium tetroxide, stained with uranyl acetate and dehydrated in a graded series of ethanol and propylene oxide and embedded in Epon. All EM reagents were purchased from FLUKA (Sigma-Aldrich, St. Louis, MO, USA). Sectioning of the EM blocks was performed using a Reichert Ultracut. Sections were placed on formvar coated Cu slit grids (PLANO (Wetzlar, Germany) and poststained with lead citrate according to standard procedures.

## Supplemental tables

Table S-II: RPKM-values for genes expressed by ECs.

| gene    | isoforms | C-Norm1  | C-Norm2  | C-Norm3  | C-Norm4  | Mean     |
|---------|----------|----------|----------|----------|----------|----------|
| fli1a   | ENSDART0 | 385.612  | 1076.853 | 487.3118 | 502.1537 | 612.9827 |
| fli1b   | ENSDART0 | 23.76332 | 84.63377 | 64.28497 | 75.73571 | 62.10444 |
| kdr1    | ENSDART0 | 142.5056 | 147.8497 | 243.2102 | 283.082  | 204.1619 |
| kdr     | ENSDART0 | 83.91168 | 49.2961  | 101.5372 | 121.7231 | 89.11701 |
| flt1    | ENSDART0 | 110.7838 | 28.07704 | 12.77522 | 16.95929 | 42.14883 |
| flt4    | ENSDART0 | 44.13958 | 26.38287 | 96.81064 | 81.4801  | 62.2033  |
| efnb2a  | ENSDART0 | 39.48331 | 69.75772 | 31.60848 | 37.52966 | 44.59479 |
| ephb4   | ENSDART0 | 36.65516 | 47.08962 | 41.74447 | 53.90552 | 44.84869 |
| notch1b | ENSDART0 | 48.96453 | 60.56181 | 51.42755 | 56.94751 | 54.47535 |
| dll4    | ENSDART0 | 217.5009 | 229.5169 | 178.1177 | 241.3114 | 216.6117 |
| nrp1a   | ENSDART0 | 88.07875 | 70.53185 | 13.4     | 20.89838 | 48.22725 |
| nrp1b   | ENSDART0 | 12.70421 | 15.09144 | 5.966144 | 11.68714 | 11.36223 |
| pdgfb   | ENSDART0 | 148.643  | 282.2319 | 240.7203 | 257.933  | 232.382  |
| tek     | ENSDART0 | 51.06712 | 47.6458  | 204.3118 | 242.4483 | 136.3682 |
| tie1    | ENSDART0 | 7.592462 | 33.2523  | 40.72372 | 40.29371 | 30.46555 |

Table S-III: RPKM-values for genes associated with non-vascular retinal cell types

| gene                        | isoforms | C-Norm1  | C-Norm2  | C-Norm3  | C-Norm4  | Mean     |
|-----------------------------|----------|----------|----------|----------|----------|----------|
| Pericyte/Smooth muscle cell |          |          |          |          |          |          |
| CSPG4                       | ENSDART0 | 0.376291 | 0        | 0        | 0        | 0.094073 |
| desm                        | ENSDART0 | 0        | 0        | 0        | 0        | 0        |
| abcc9                       | ENSDART0 | 5.096336 | 1.603377 | 6.456484 | 2.927891 | 4.021022 |
| kcnj8                       | ENSDART0 | 0        | 0        | 0        | 1.660756 | 0.415189 |
| Neuron                      |          |          |          |          |          |          |
| dbx1b                       | ENSDART0 | 0        | 0        | 0        | 0        | 0        |
| dbx2                        | ENSDART0 | 0        | 0        | 0        | 0        | 0        |
| Astrocyte/Oligodendrocyte   |          |          |          |          |          |          |
| gfap                        | ENSDART0 | 2.377143 | 0        | 4.382913 | 5.721054 | 3.120277 |
| mbp                         | ENSDART0 | 0        | 0        | 0        | 0        | 0        |
| aldh1a3                     | ENSDART0 | 3.801208 | 0        | 0        | 1.688925 | 1.372533 |
| pax6a                       | ENSDART0 | 0        | 1.93473  | 0        | 0        | 0.483683 |
| pax6b                       | ENSDART0 | 0        | 1.55004  | 0        | 0        | 0.38751  |
| calb2                       | ENSDART0 | 0        | 0        | 0        | 0        | 0        |

## Supplemental figure legends

### Figure S-I. Endothelial density in retinal and choroidal vasculatures in zebrafish. **A:**

Western blot using anti-GFP and anti-bactin (control) antibodies on proteins extracted from adult *fli1a:EGFP* retinas and choroids **B, C:** FACS of GFP<sup>+</sup> endothelial cells from retinae (**B**) or choroids (**C**). Green dots indicate endothelial cells, blue dots indicate non-endothelial cells.

**D:** Quantifications of the cell counts from the experiment shown in **B** and **C**. Results are given as percent endothelial cells compared to the total cell population of the tissue. R:

Retina. C: Choroid. n=12-16 fish. \*\*:p<0.01.

### Figure S-II. Smooth muscle cell coverage of the choriocapillaris of adult zebrafish. **A:**

Confocal micrographs of adult *Kdrl:DsRed;Acta2:EGFP* double transgenic zebrafish. Boxed regions are shown in the magnified images below. White arrowheads indicate smooth muscle fiber extensions. Scale-bars indicate 100  $\mu\text{m}$  for retinal vessels and 50  $\mu\text{m}$  for CCs. **B:** Quantification of the percentage of the EGFP<sup>+</sup> endothelium that was covered by Acta2<sup>+</sup> cells from the experiment shown in **A**. A: Arterial region. C: Capillary region. n=5-10.

\*\*\*:p<0.001.

### Figure S-III. CDH5 and GFAP coverage in the zebrafish. **A-B:**

Confocal micrographs of *fli1a:EGFP* zebrafish retinal vessels and CCs stained with anti-CDH5 (**A**) or anti-GFAP antibodies. Size-bars indicate 50  $\mu\text{m}$  for retinal vessels and 25  $\mu\text{m}$  for CCs.

**Figure S-IV. HIF1 $\alpha$  and HIF2 $\alpha$  are stabilized in hypoxia.** Bright field micrograph of the outer nuclear layer stained with antibodies recognizing HIF1 $\alpha$  or HIF2 $\alpha$  (positive signals in red) from adult zebrafish treated with normoxia or hypoxia for 10 days.

**Figure S-V. High blood pressure is not sufficient to drive PVR. A:** Confocal micrographs of CCs from adult vehicle or clenbuterol treated fli1a:EGFP zebrafish. Size bars indicate 25  $\mu$ m. **B:** Quantification of number of extravascular columns from experiment shown in **A**. V= vehicle, C= clenbuterol, NS= non-significant. n= 5-10.

**Figure S-VI. Genes containing HREs in the promotor region were not enriched among de-regulated transcripts following 10 days of hypoxia treatment.** Lists of Up- or down-regulated genes from hypoxia-exposed zebrafish compared to controls were used to generate lists of orthologous human genes, which in turn were compared to lists of genes from HUVEC cells known to have HIF1a (**A**) or HIF2a (**B**) bound at their promoters following a hypoxic insult<sup>24, 25</sup>.

**Figure S-VII. Differential cytoskeletal dynamics in choroidal ECs during hypoxia-induced PVR.** Functional annotation clusters containing up- and down-regulated genes in endothelial cells from hypoxia-exposed adult zebrafish choroids compared to endothelial cells from normoxia control zebrafish.

**Figure S-VIII. Lack of UCHD-associated f-actin bundles in choroidal ECs** **A:** Confocal micrographs of choriocapillaries (CCs) in *fli1a:GFP;UAS:RFP;UAS:UCDH-GFP* fish in which the *fli1a*<sup>+</sup> endothelium is labeled in red and UCHD<sup>+</sup> f-actin bundles in green. **B:** Western blot for GFP- or  $\beta$ -actin-expression in choroids of the fish shown in **A**. L: Ladder, C: Choroid.

**Figure S-IX. Phalloidin coverage in CCs.** Confocal micrographs of adult *fli1a:EGFP* normoxia- or hypoxia-exposed zebrafish CCs stained with phalloidin. White arrow heads indicates f-actin bundles associated with incomplete/immature transluminal pillars. Size-bars indicate 25  $\mu$ m.

**Figure S-X. Open CCs in hypoxia- or VEGF-treated zebrafish and rats respectively.** TEM images showing pathological CCs in hypoxia-treated zebrafish (**A**) or following VEGF-overexpression in rats (**B**). . Boxed regions are shown in magnified images to the right. F: Fenestrations. ELPs: Endothelial luminal processes.

**Figure S-XI. Reduced Collagen-fibers and connections between endothelial and vascular mural cells in hypoxia.** Transmission electron micrographs of the choriocapillaris in adult zebrafish treated with normoxia or hypoxia. Boxed regions are shown in magnified images below. Yellow arrows point to collagen fibers. White arrows point to connections between endothelial and vascular mural cells. Yellow "Ps" indicate the RPE-side of the extravascular columns, while "Ls" indicate the vascular lumens. T: Tight junction. Size bar indicate 5  $\mu$ m.



**Figure S-XII. VEGFR-signaling in the CCs is activated by hypoxia. A:** Fluorescent micrographs of cross sections through the retinal vessels (RVs) or choriocapillaris (CCs) stained with antibodies recognizing phosphorylated VEGFR2 (positive signals in white) and counterstained with DAPI (nuclei shown in blue) from adult zebrafish treated with normoxia or hypoxia for 10 days. **B:** Relative expression of known VEGF-target genes in hypoxia-treated fish compared to normoxia treated fish extracted from the RNA-sequencing data in Table S4

# Supplemental Figure I

A

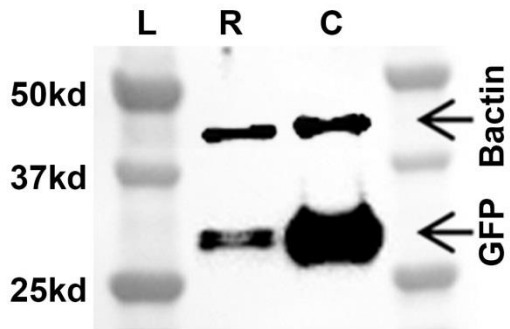

B

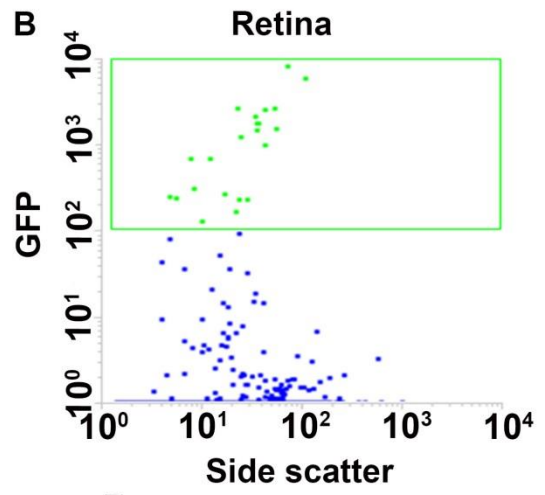

C

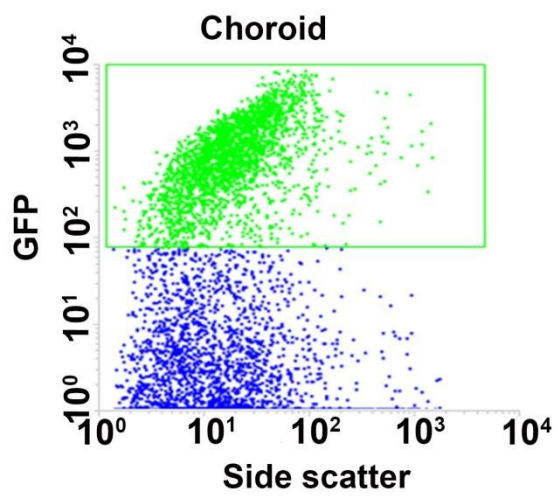

D

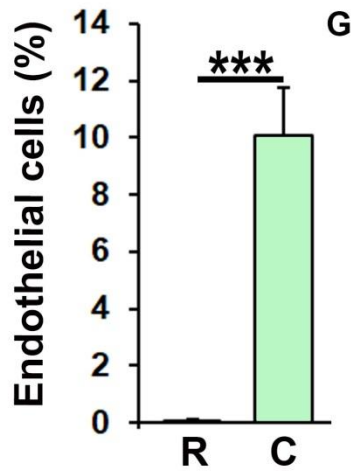

Supplemental Figure II

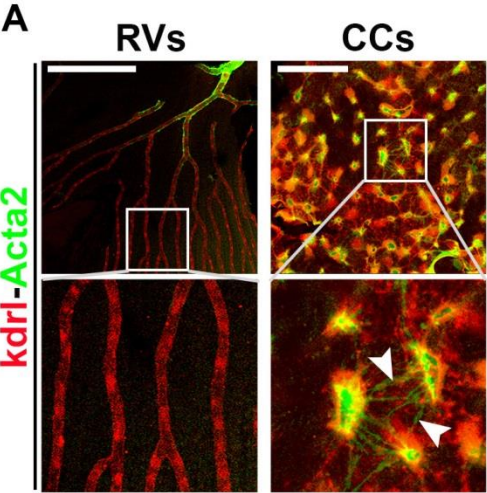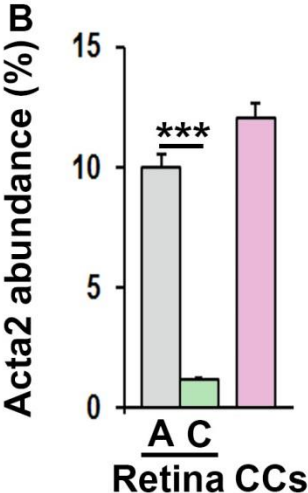

## Supplemental Figure III

**A**

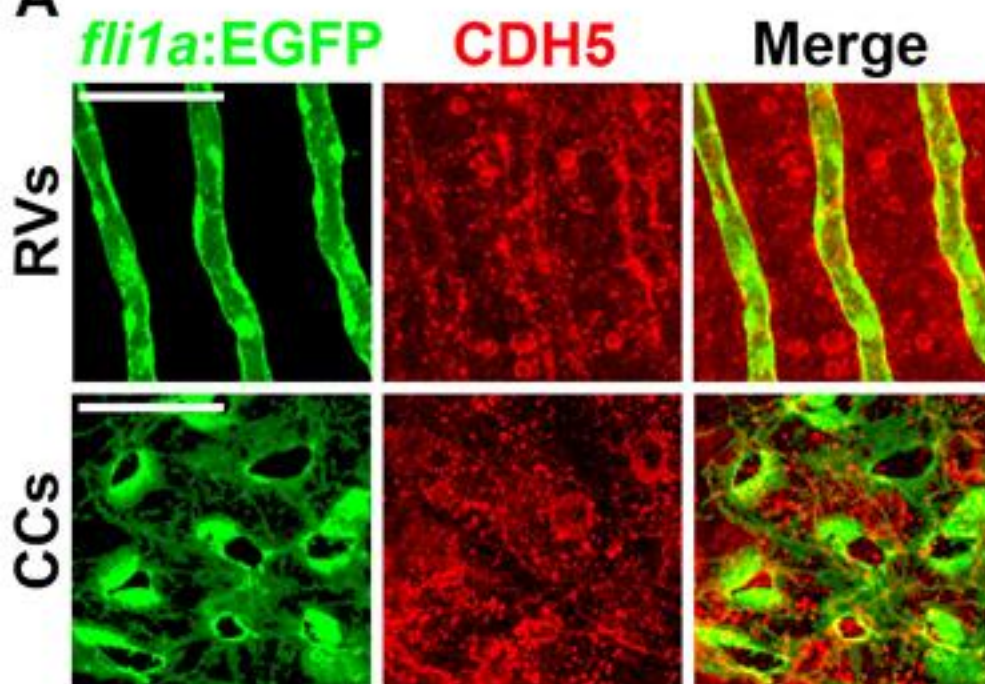

**B**

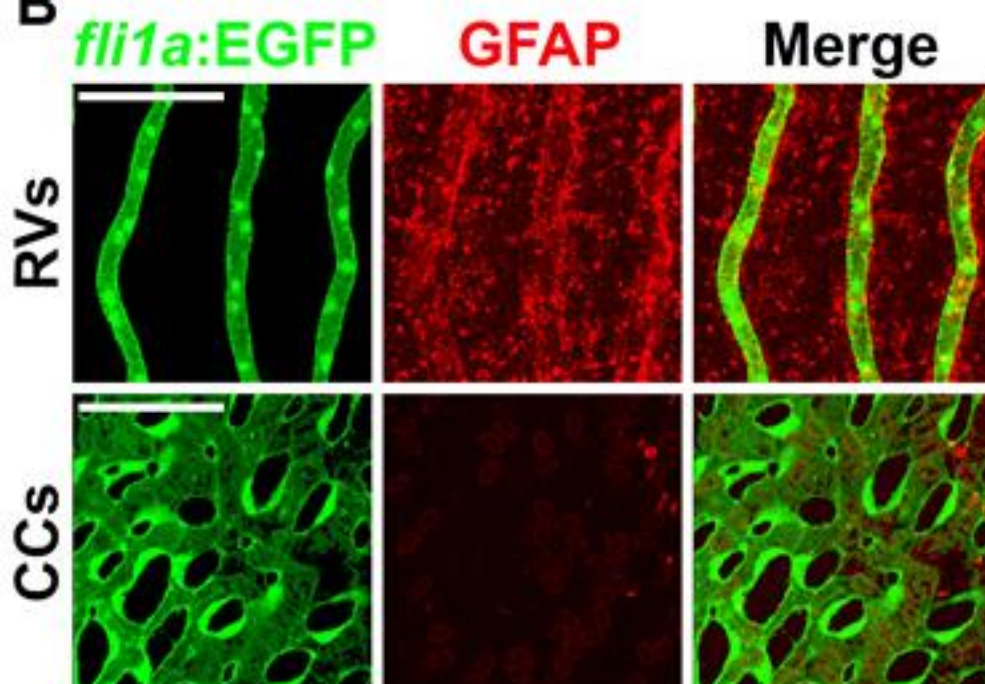

# Supplemental Figure IV

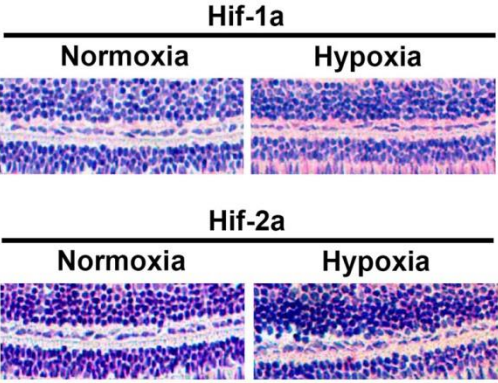

# Supplemental Figure V

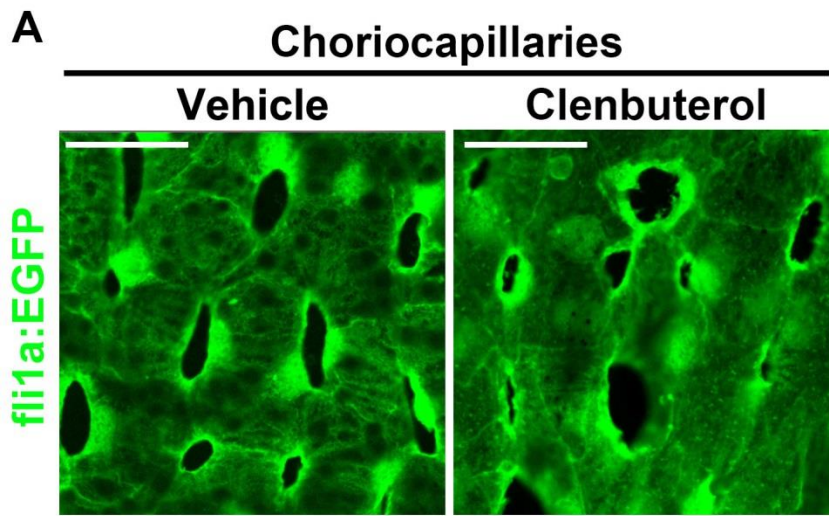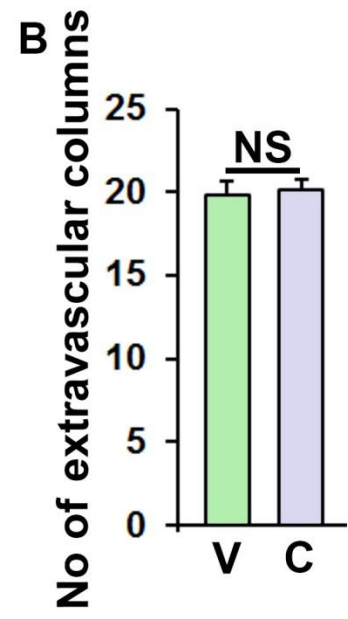

## Supplemental Figure VI

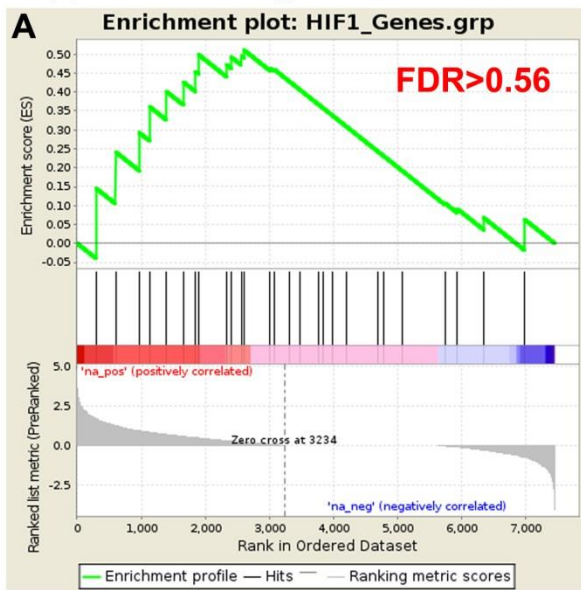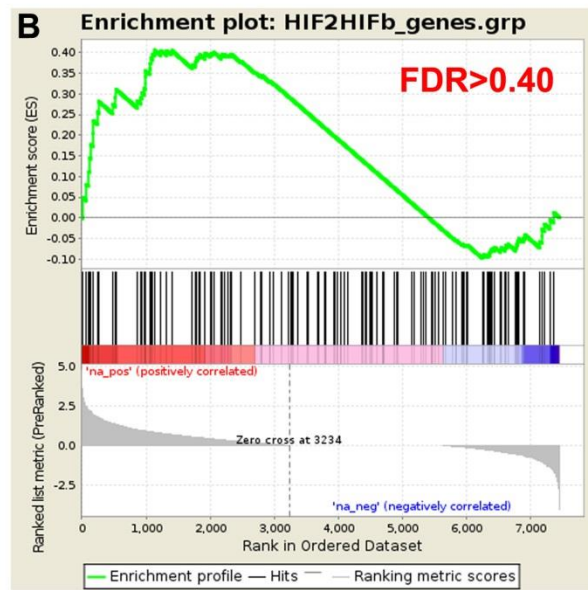



### Supplemental Figure VII

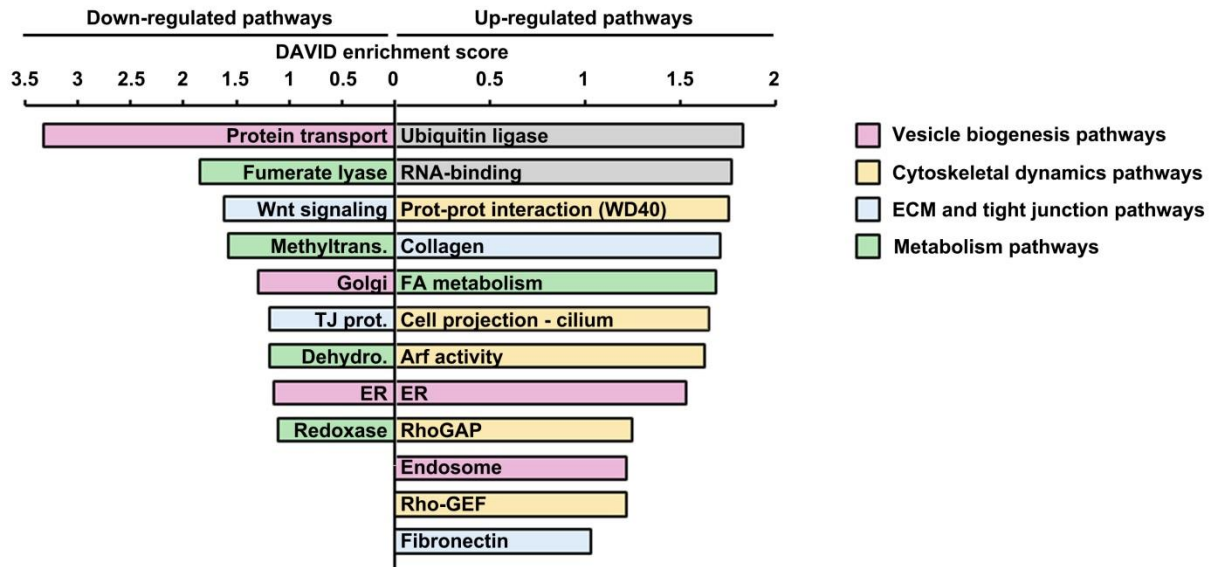



# Supplemental Figure VIII

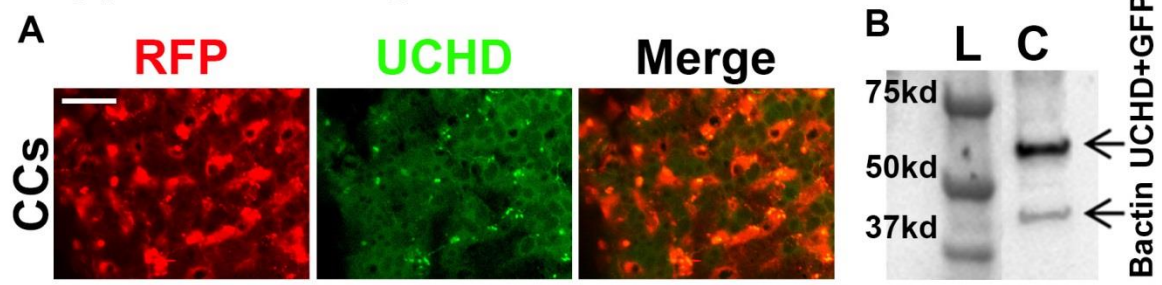

Supplemental Figure IX

Choriocapillaries

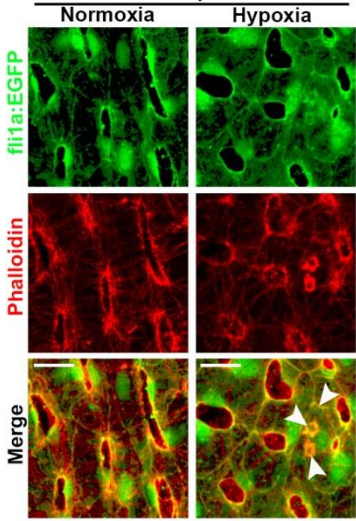

Supplemental Figure X

A

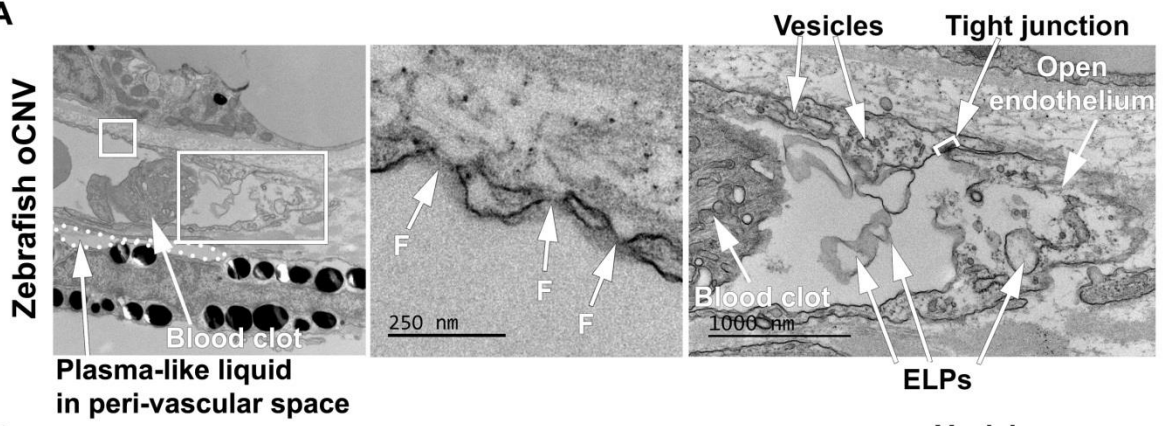

B

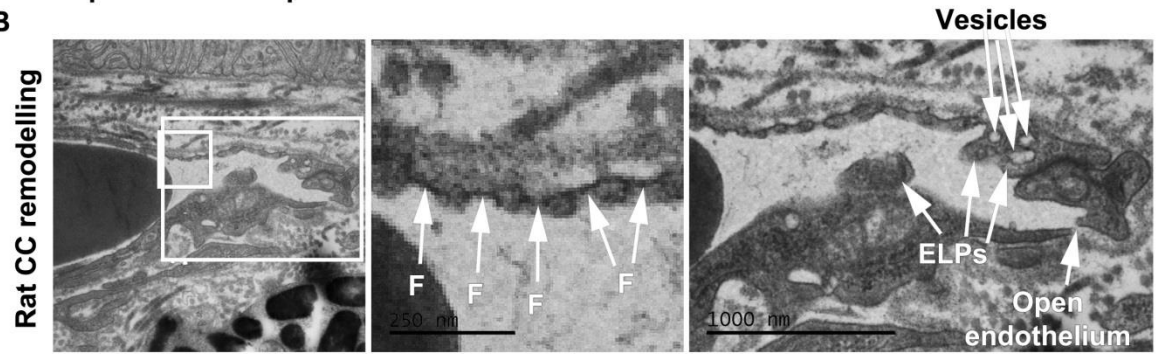

Supplemental Figure XI

Normoxia

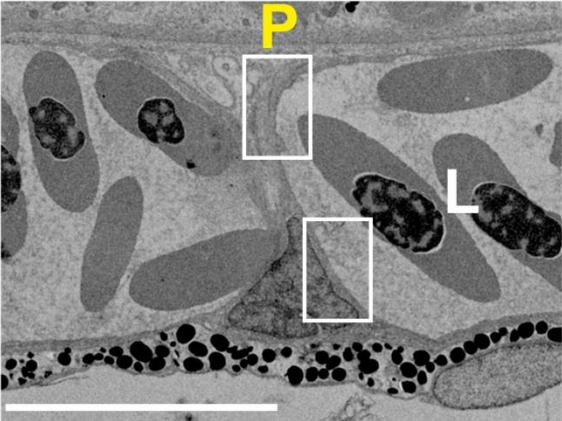

Hypoxia

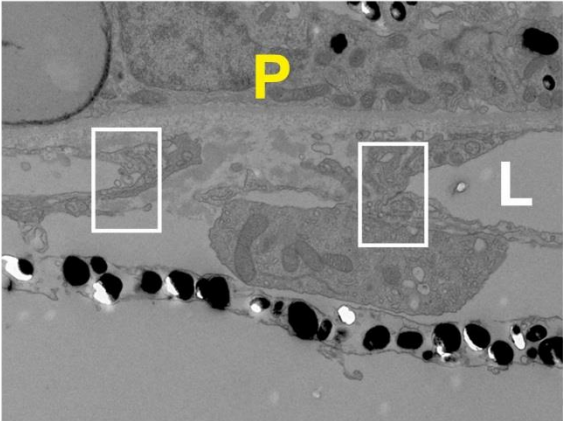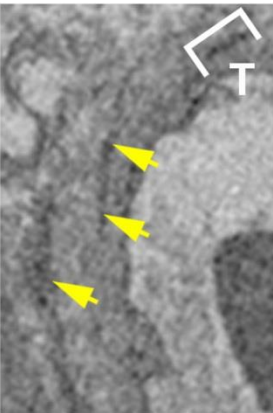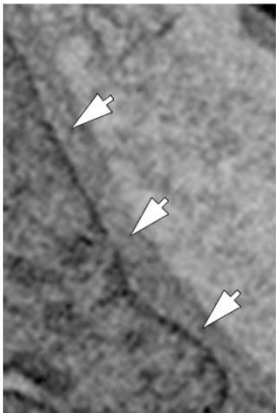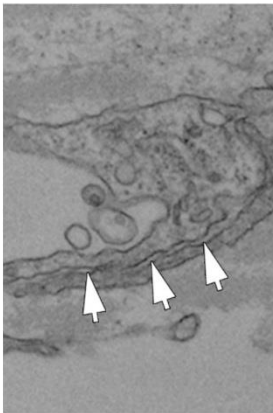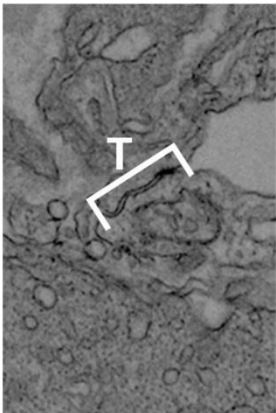

# Supplemental Figure XII

**A**

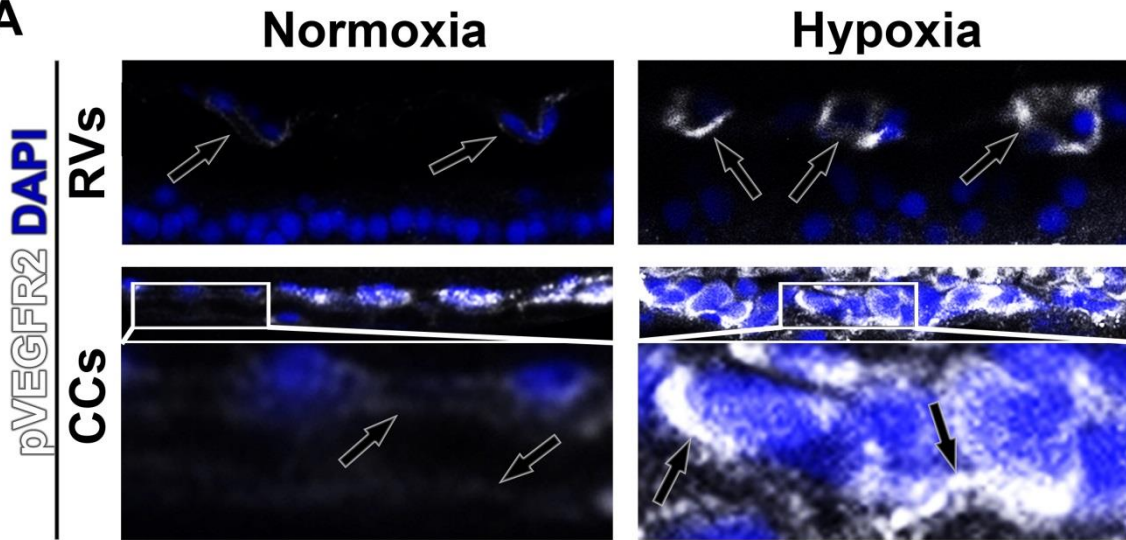

**B**

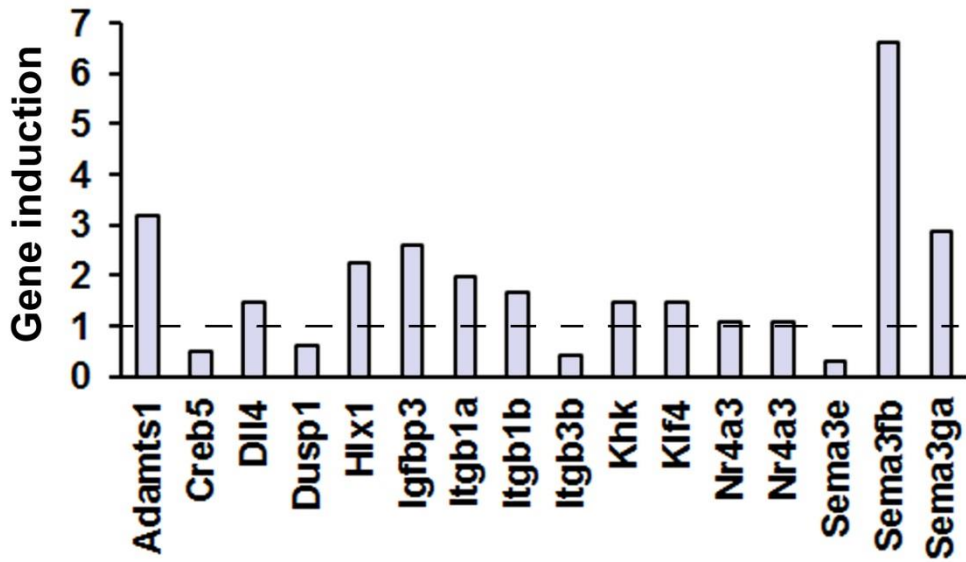

Supplement: atv-39-1402-s001.pdf [file atv-39-1402-s001.pdf]
