# Supplementary material for: Intussusceptive Vascular Remodeling Precedes Pathological Neovascularization
Source: PubMed Central journal article supplement (PMC6636809; doi:10.1161/atvbaha.118.312190), 2019-05-09
Supplement: atv-39-1402-s002.pdf [file atv-39-1402-s002.pdf]

Supplemental Table S-I: Major resource table

**Zebrafish strains used in this study**

| Strain name                                                 | Affected promoter/protein     | Cell type/structure | Fluorophore               | Ref. |
|-------------------------------------------------------------|-------------------------------|---------------------|---------------------------|------|
| Tg( <i>fli1a</i> :EGFP) <sup>y1</sup>                       | <i>fli1a</i>                  | Endothelial         | Green                     | 54   |
| Tg( <i>kdrl</i> :EGFP) <sup>s843</sup>                      | <i>kdrl</i>                   | Endothelial         | Green                     | 55   |
| Tg( <i>kdrl</i> :DsRed2) <sup>pd27</sup>                    | <i>kdrl</i>                   | Endothelial         | Red                       | 56   |
| Tg( <i>acta2</i> :EGFP) <sup>ca7</sup>                      | <i>acta2</i>                  | Smooth muscle       | Green                     | 57   |
| Tg( <i>tagln</i> :EGFP) <sup>p151</sup>                     | <i>tagln</i>                  | Smooth muscle       | Green                     | 58   |
| Tg( <i>gata1a</i> :DsRed2)                                  | <i>gata1a</i>                 | Erythroblast        | Red                       | 59   |
| Tg( <i>fli1ep</i> :Gal4FF) <sup>ubs3</sup>                  | <i>fli1a</i>                  | Endothelial         | No colour                 | 60   |
| Tg(UAS:RFP)                                                 | UAS                           | All (ubiquitous)    | Red                       | 61   |
| Tg(UAS:VE-Cadherin-EGFP) <sup>ubs17</sup>                   | VE-Cadherin ( <i>cdh5</i> )   | Tight junctions     | Green                     | 61   |
| Tg(UAS:EGFP-ZO.1) <sup>ubs5</sup>                           | ZO.1                          | Tight junctions     | Green                     | 62   |
| Tg(UAS:EGFP-ECHD) <sup>ubs19</sup>                          | fActin                        | Cytoskeleton        | Green                     | 63   |
| Tg( <i>pdgfrb</i> :mCitrine)                                | <i>pdgfrb</i>                 | Pericytes           | Green                     | 64   |
| <i>hif1aa</i> <sup>-/-</sup> ; <i>hif1ab</i> <sup>-/-</sup> | <i>hif1aa</i> , <i>hif1ab</i> | All (ubiquitous)    | Null-mut.                 | 65   |
| <i>hsp70</i> :VEGFAa-DN                                     | VEGF-Aa                       | All (ubiquitous)    | Dominant negative isoform | 66   |

**Primers used in this study**

| Primer name             | Sequence (5' -> 3')     |
|-------------------------|-------------------------|
| <i>hVegfa</i> -forward  | AGGGCAGAATCATCACGAAGT   |
| <i>hVegfa</i> -reverse  | AGGGTCTCGATTGGATGGCA    |
| <i>hPlgf</i> -forward   | GAACGGCTCGTCAGAGGTG     |
| <i>hPlgf</i> -reverse   | ACAGTGCAGATTCTCATCGCC   |
| <i>hVegfr1</i> -forward | GAAAACGCATAATCTGGGACAGT |
| <i>hVegfr1</i> -reverse | GCGTGGTGTGCTTATTTGGA    |
| <i>hVegfr2</i> -forward | AACGTGTCACTTTGTGCAAGA   |
| <i>hVegfr2</i> -reverse | TTCCATGAGACGGACTCAGAA   |
| <i>hTbp</i> -forward    | CCACTCACAGACTCTACAAC    |
| <i>hTbp</i> -reverse    | CTGCGGTACAATCCCAGAACT   |

**Antibodies used in this study**

| Target antigen | Brand      | Catalog #  | Dilution |
|----------------|------------|------------|----------|
| ZO-1           | Invitrogen | 61-7300    | 1:250    |
| GFAP           | Sigma      | SAB2702474 | 1:50     |
| VE-Cadherin    | Ref: 49    | Ref: 49    | 1:200    |
| Col-I          | Abcam      | GR3211489  | 1:200    |

|                                 |                   |           |        |
|---------------------------------|-------------------|-----------|--------|
| HIF1a                           | Novus             | NB100-134 | 1:600  |
| HIF2a                           | Novus             | NB100-122 | 1:300  |
| pVEGFR2                         | Abcam             | Ab5473    | 1:50   |
| $\beta$ Actin                   | Invitrogen        | PA1-21167 | 1:2000 |
| GFP                             | Invitrogen        | A-11122   | 1:2000 |
| PECAM/CD31                      | R&D Biosciences   | AF3628    | 1:200  |
| VEGFR1                          | Imclone           | MF1       | 1:200  |
| VEGFR2                          | Imclone           | DC101     | 1:200  |
| Goat-anti-rabbit<br>Alexa-555   | Life technologies | A21428    | 1:200  |
| Goat-anti-rabbit<br>Alexa-647   | Invitrogen        | A21345    | 1:2000 |
| Donkey-anti-rabbit<br>Alexa-555 | Invitrogen        | A31572    | 1:400  |
| Donkey-anti-goat<br>Alexa-647   | Invitrogen        | A21447    | 1:200  |
| Goat-anti-rat<br>Alexa-555      | Invitrogen        | A21434    | 1:400  |
